# Supplementary material for: Magnetoelastic coupling in the stretched diamond lattice of TbTaO4
Source: Royal Society of Chemistry journal article supplement (doi:10.1039/d4ma01156b), 2025-01-01
Supplement: d4ma01156b1.pdf [file d4ma01156b1.pdf]

## SUPPLEMENTARY INFORMATION

for

### Magnetoelastic coupling in the stretched diamond lattice of TbTaO<sub>4</sub>

Xiaotian Zhang,<sup>\*a</sup> Nicola D. Kelly,<sup>ab</sup> Denis Sheptyakov,<sup>c</sup> Cheng Liu,<sup>a</sup> Shiyu Deng,<sup>ad</sup>

Siddharth S. Saxena<sup>\*a</sup> and Siân E. Dutton <sup>\*a</sup>

<sup>a</sup> Cavendish Laboratory, University of Cambridge, JJ Thomson Avenue, Cambridge, CB3 0HE, United Kingdom.

<sup>b</sup> Department of Chemistry, University of Oxford, Mansfield Rd, Oxford OX1 3TA, United Kingdom.

<sup>c</sup> Laboratory for Neutron Scattering and Imaging, Paul Scherrer Institut (PSI), Forschungsstrasse 111, 5232 Villigen PSI, Switzerland.

<sup>d</sup> Institut Laue-Langevin (ILL), 71 Avenue des Martyrs, 38000 Grenoble, France.

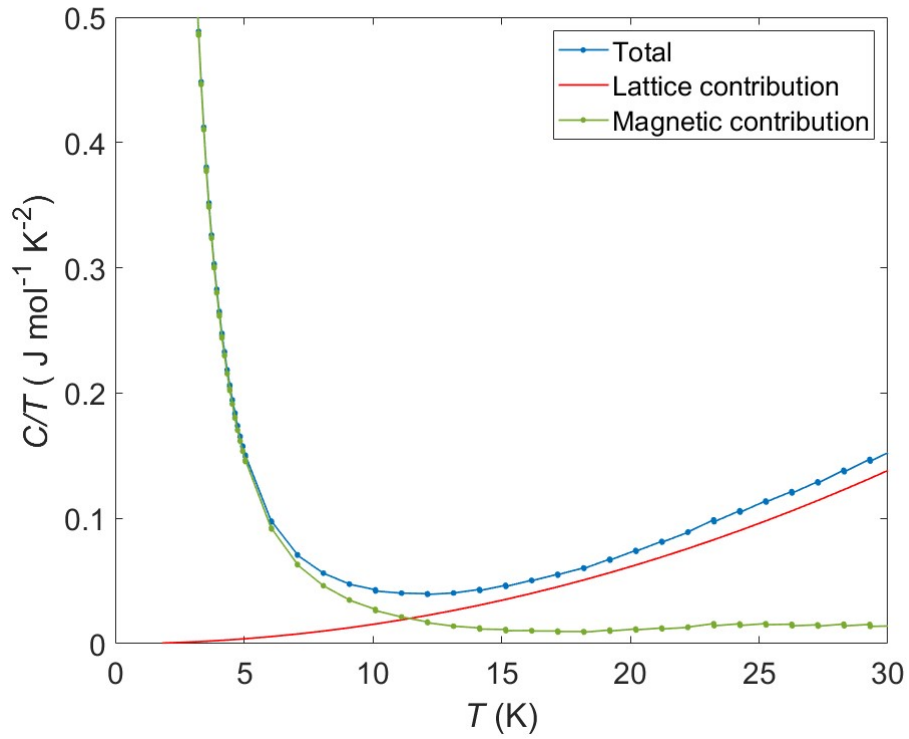

Fig. S1 Heat capacity data for  $M\text{-TbTaO}_4$ . Blue dots: total heat capacity (after subtraction of the Ag contribution from the raw data). Red line: Estimated lattice contribution using the Debye model with  $\theta_d=370\text{ K}$ . Green dots: magnetic contribution,  $C_{mag}=C_{total}-C_{lattice}$ .

Table S1: Refined Lattice parameters and atomic positions of  $M\text{-TbTaO}_4$  from powder X-ray diffraction at room temperature. The O atomic positions were fixed at value from previous neutron diffraction data<sup>2,3</sup>. Both  $\text{Tb}^{3+}$  and  $\text{Ta}^{5+}$  ions lie on (0.25,  $y$ , 0) sites.

| Unit cell            |             |
|----------------------|-------------|
| Space group          | $I2/a$      |
| $a/\text{Å}$         | 5.38264(15) |
| $b/\text{Å}$         | 11.0182(3)  |
| $c/\text{Å}$         | 5.06692(13) |
| $\beta/^\circ$       | 95.6844(14) |
| Volume/ $\text{Å}^3$ | 299.025(14) |
| $R_{wp}/\%$          | 7.21        |
| $\chi^2$             | 2.10        |
| Atomic positions     |             |
| $yTb$                | 0.6180 (3)  |
| $yTa$                | 0.1502 (2)  |
| $xO1$                | 0.090       |
| $yO1$                | 0.461       |
| $zO1$                | 0.252       |
| $xO2$                | -0.003      |
| $yO2$                | 0.717       |
| $zO2$                | 0.290       |

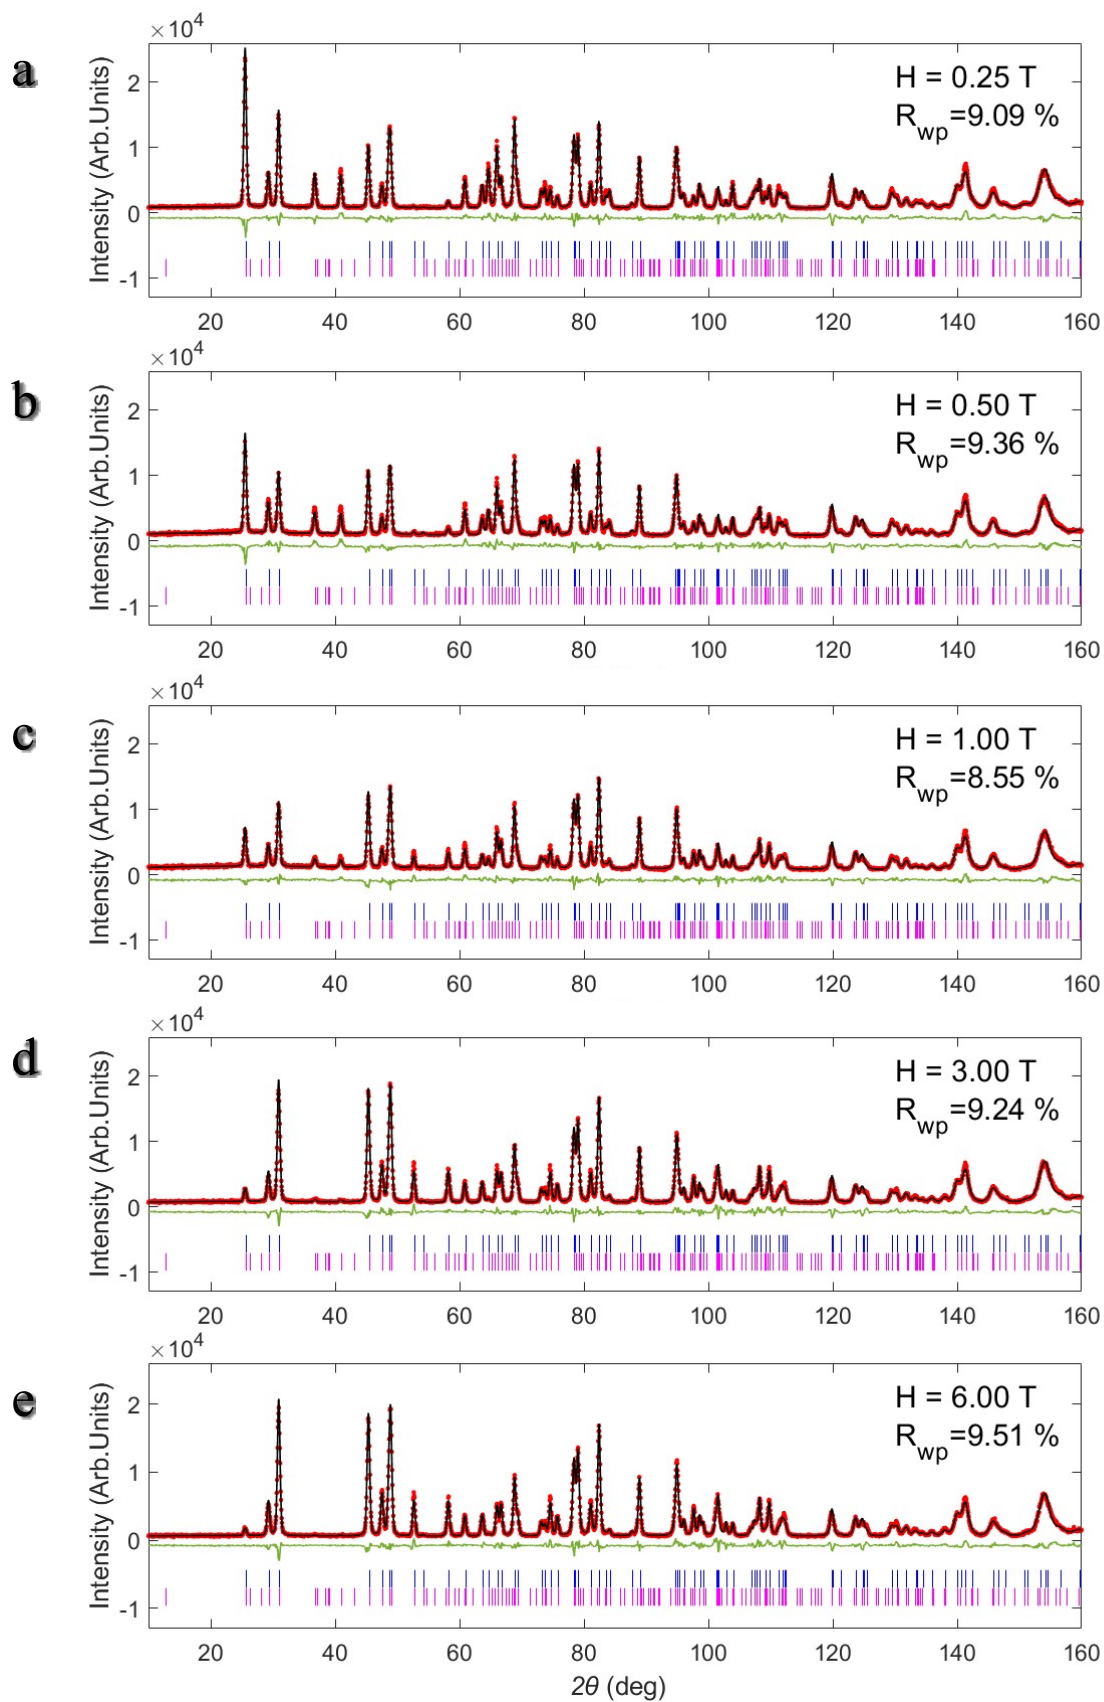

Fig. S2 (a-e) Refined PND data of  $M\text{-TbTaO}_4$  collected at 1.6 K with 0.25 T, 0.50 T, 1 T, 3 T and 6 T. Red dots, experimental data; black line, calculated intensities; green line, difference pattern; tick marks, nuclear (blue), magnetic (pink) Bragg reflection positions.

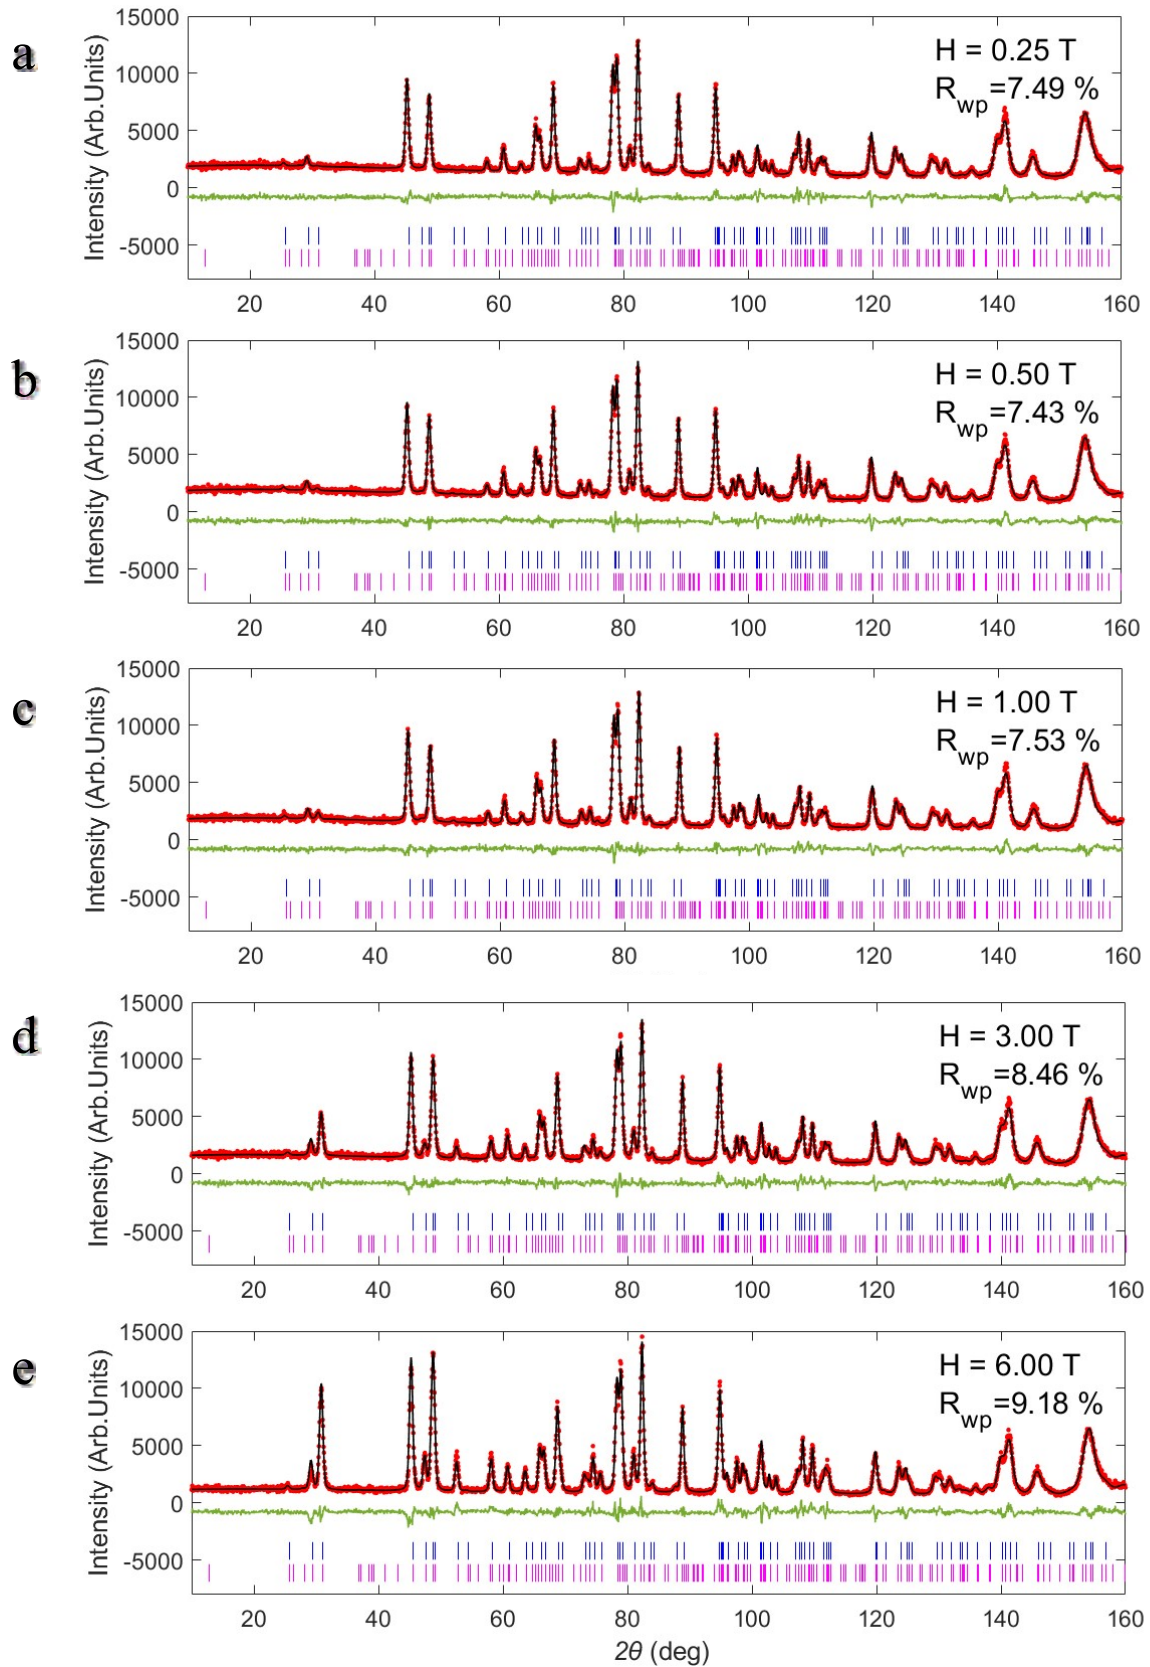

Fig. S3 (a-e) Refined PND data of  $M\text{-TbTaO}_4$  collected at 20.0 K with 0.25 T, 0.50 T, 1 T, 3 T and 6 T. Red dots, experimental data; black line, calculated intensities; green line, difference pattern; tick marks, nuclear (blue), magnetic (pink) Bragg reflection positions.

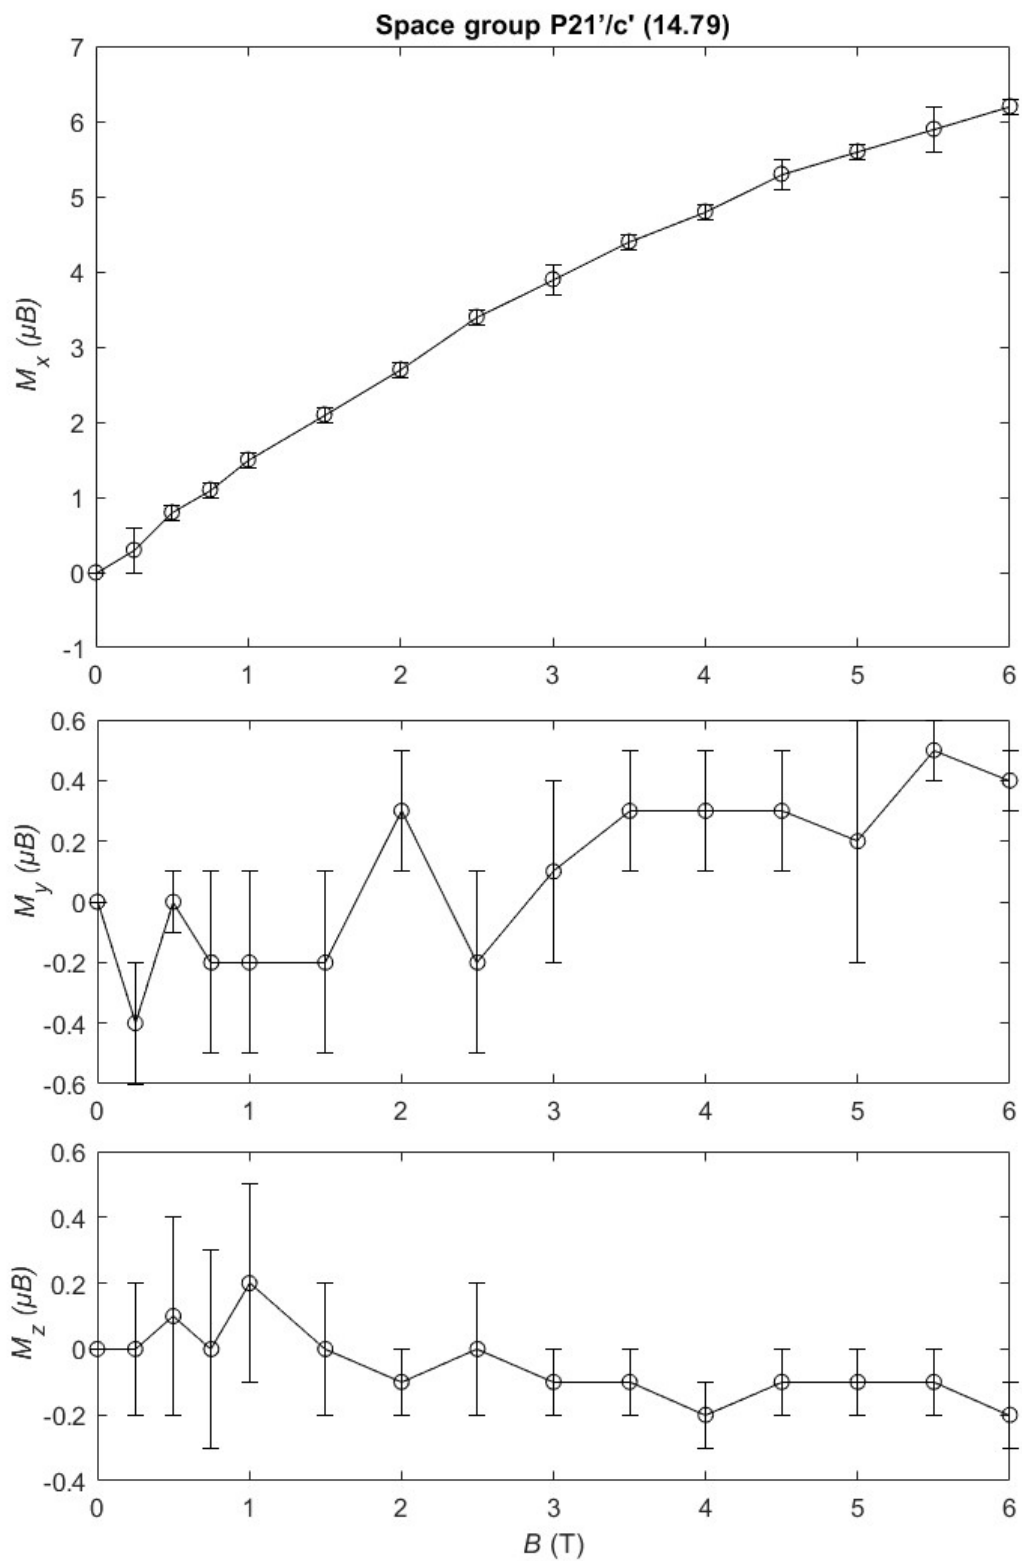

Fig. S4 Evolution of the Tb<sup>3+</sup> lattice-coordinate magnetic moments along x, y and z axes as a function of magnetic field at 20.0 K from powder neutron diffraction (PND) data.

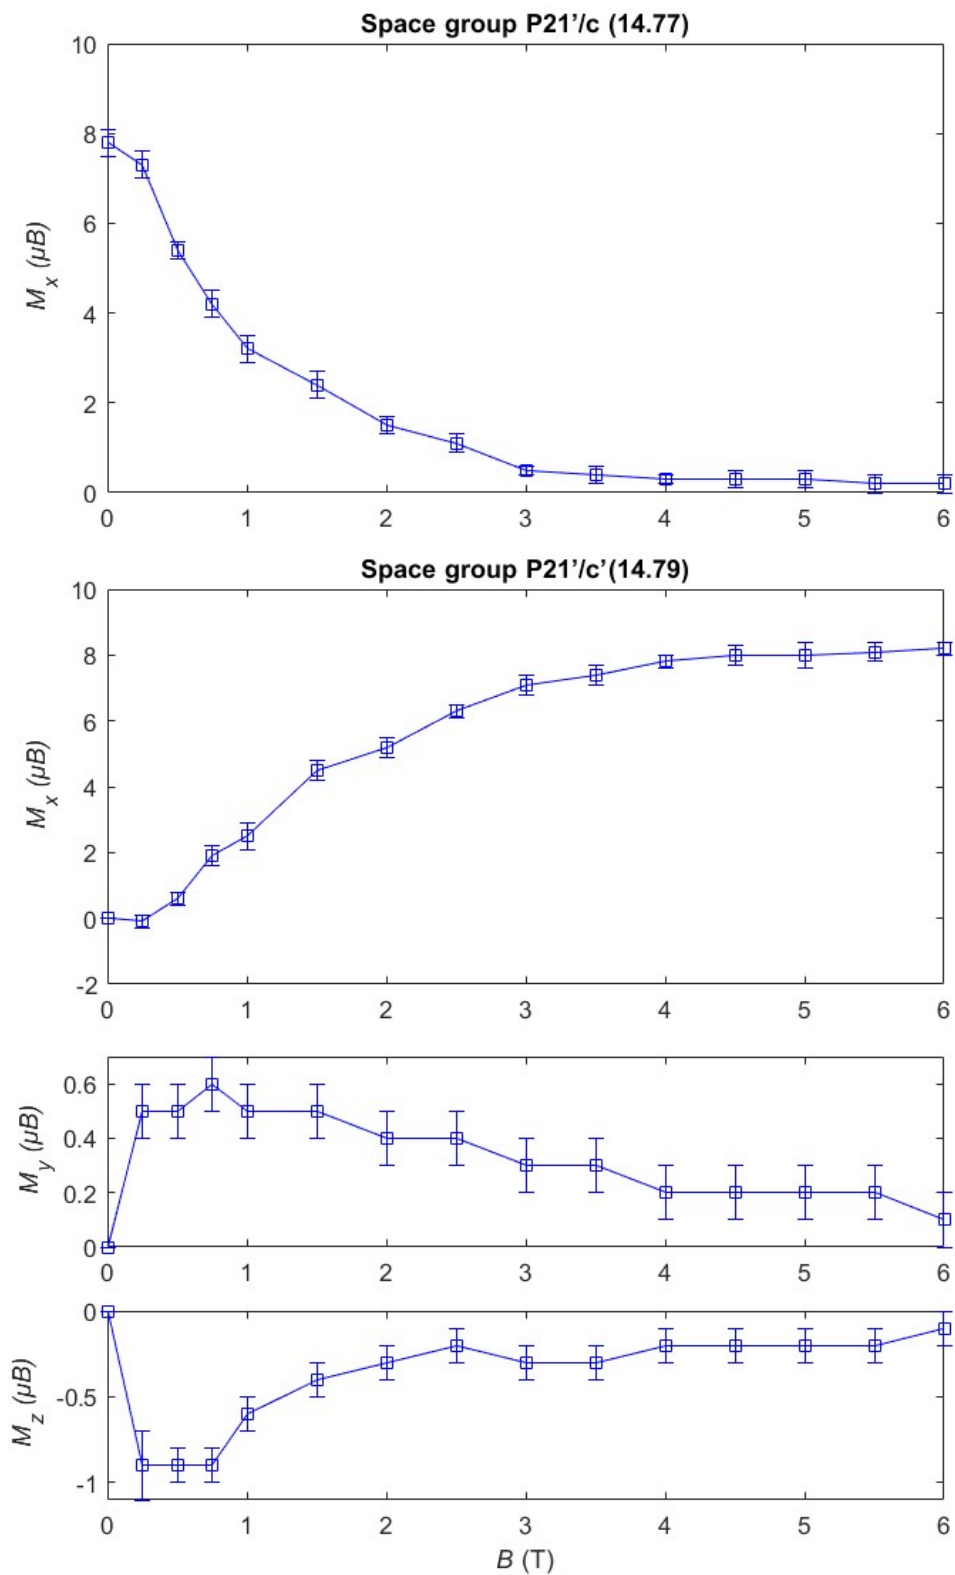

Fig. S5 Evolution of the  $\text{Tb}^{3+}$  lattice-coordinate magnetic moments along x, y and z axes as a function of magnetic field at 1.6 K from powder neutron diffraction (PND) data. The magnetic structure is modelled with a mixing of two magnetic space group. The phase fractions are fixed and identical to each other, while the magnetic moments are refined independently.

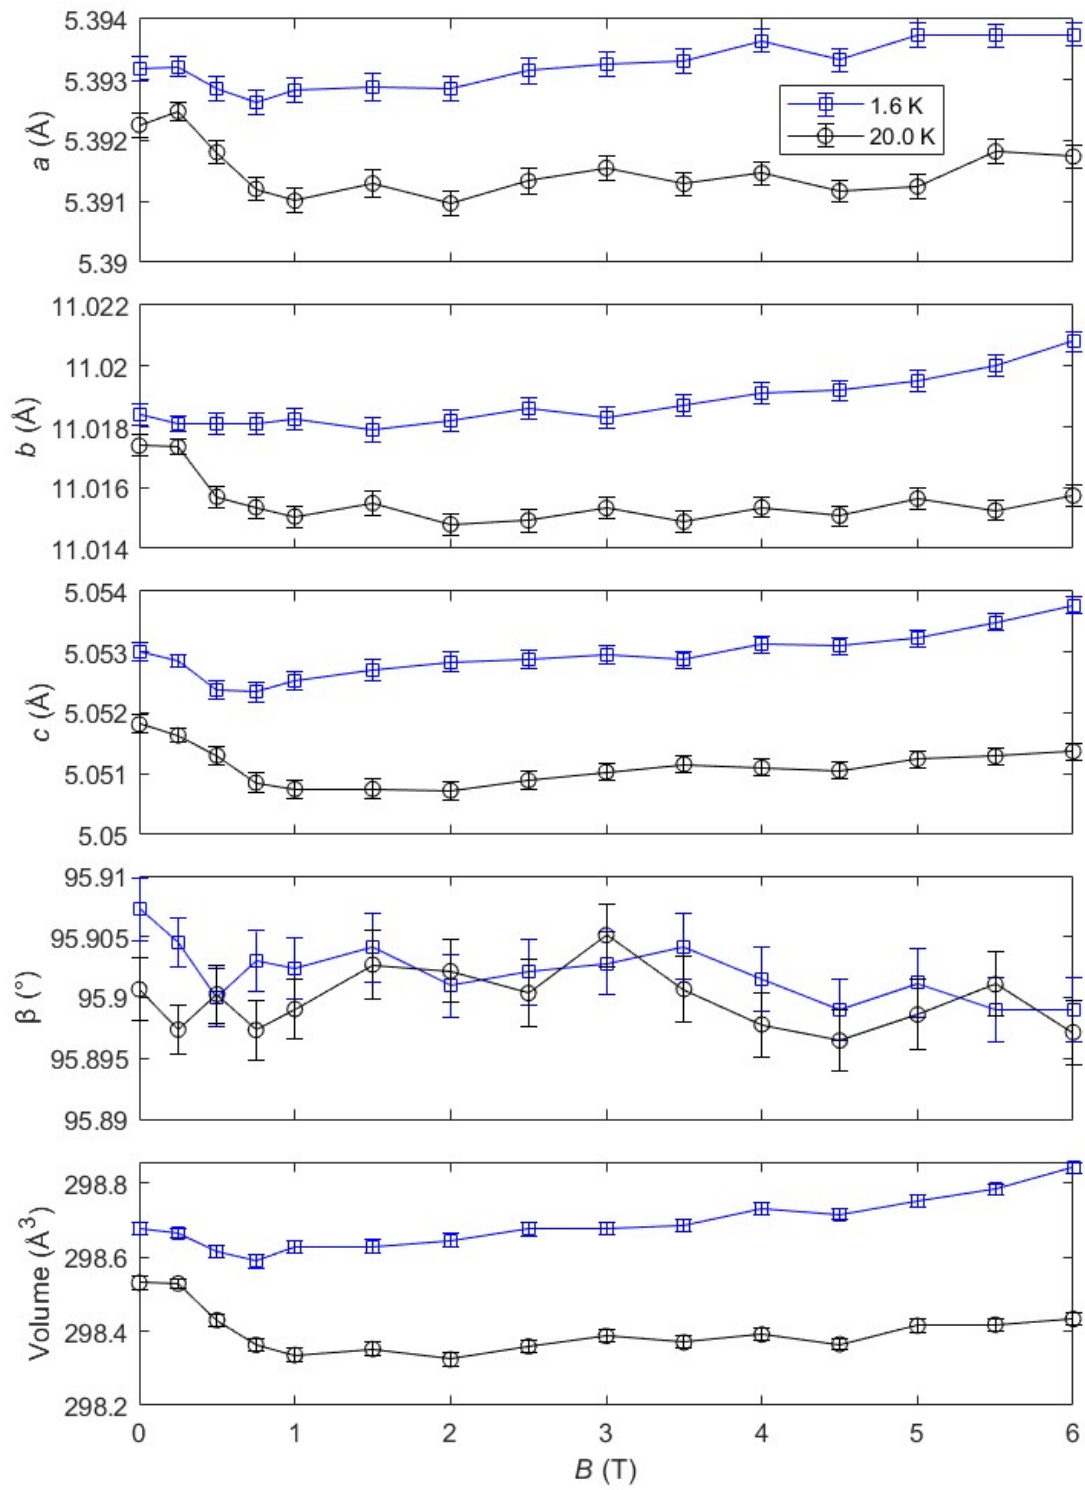



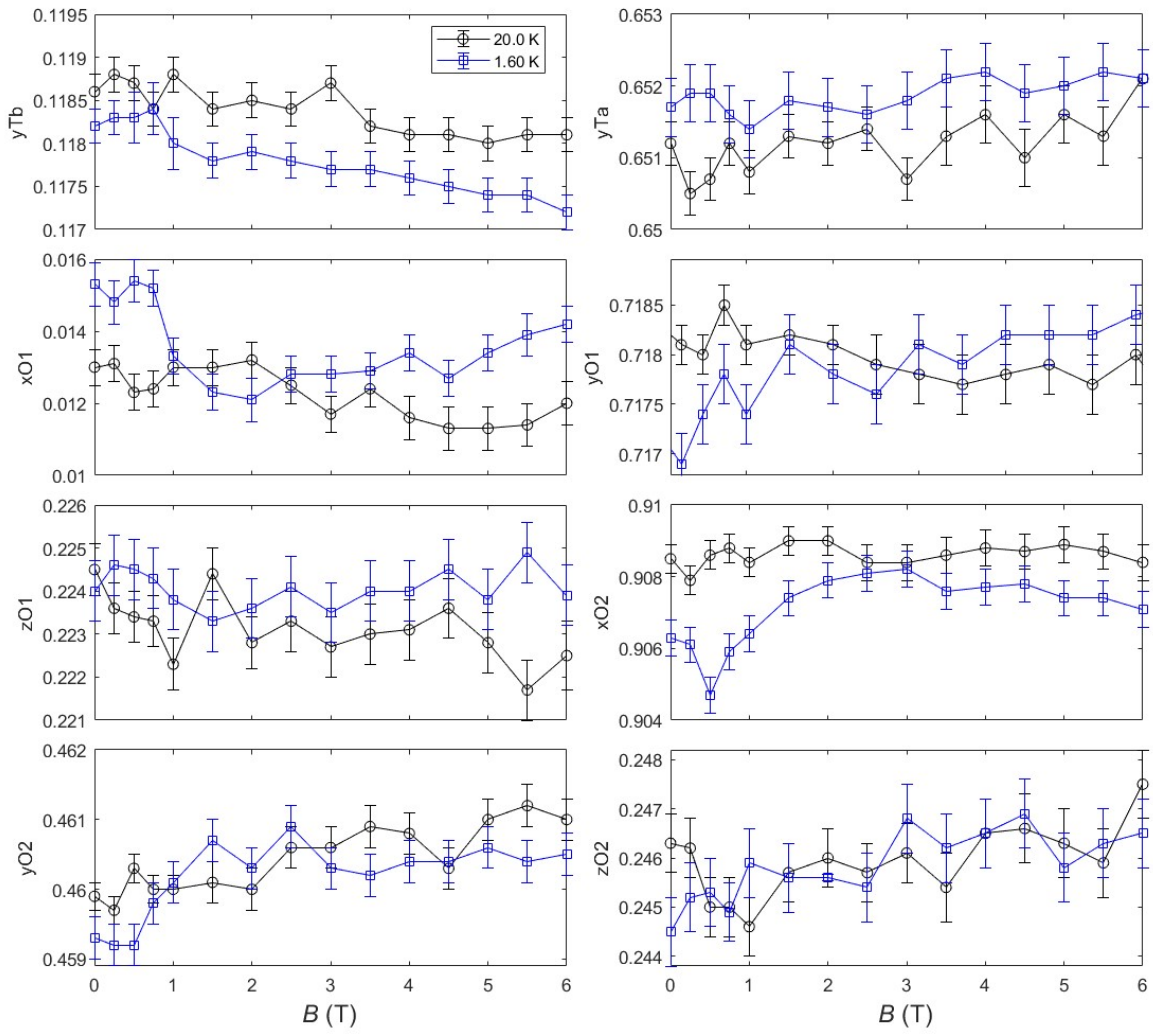

Fig. S7 Refined atomic positions of  $M\text{-TbTaO}_4$  at 1.6 K and 20K as a function of magnetic field. Obtained from Rietveld refinement of powder neutron diffraction (PND) data collected on HRPT, PSI.  $\lambda = 2.45 \text{ \AA}$ .

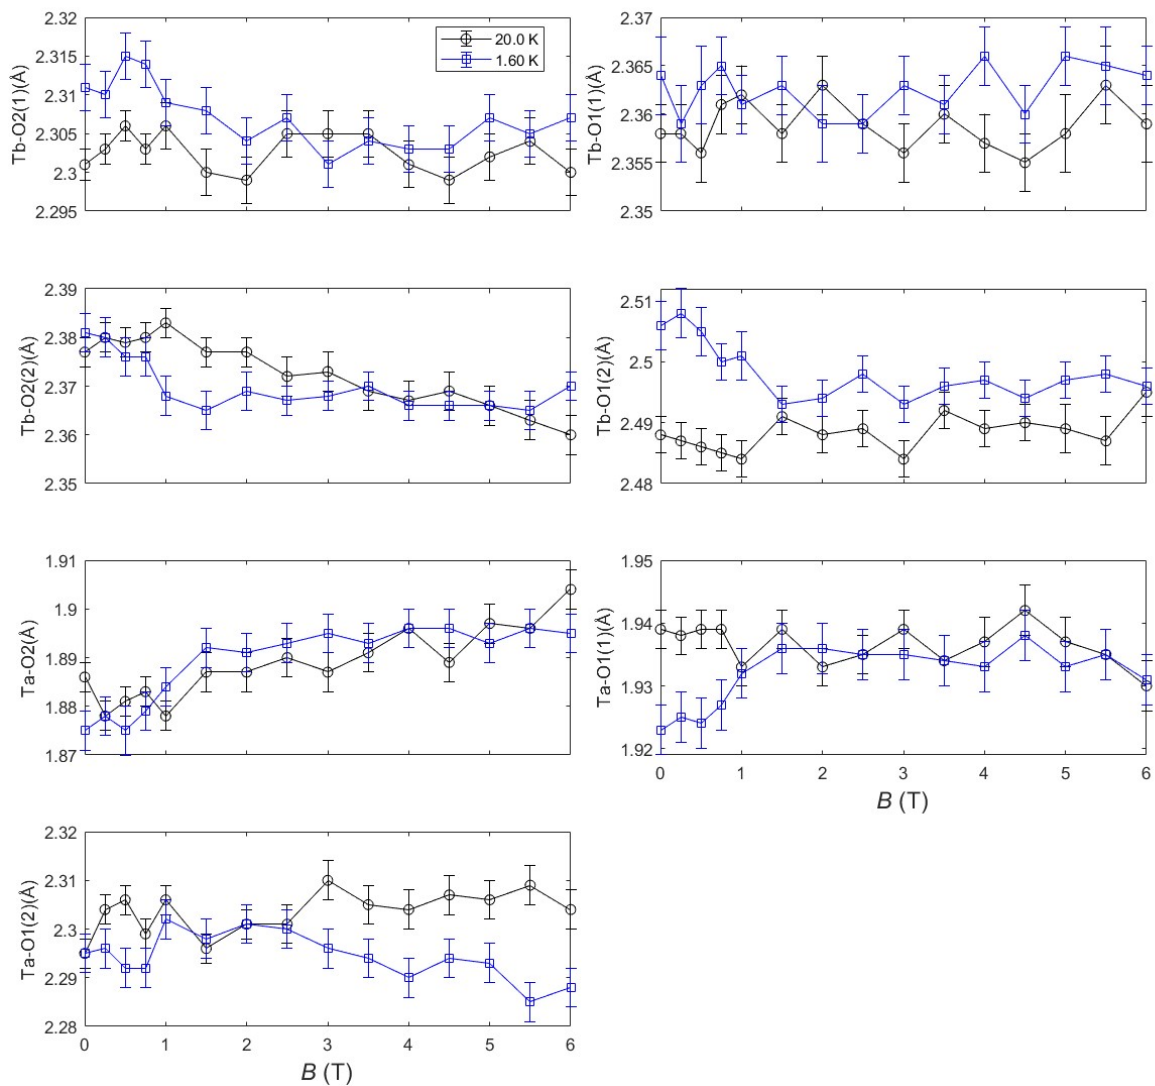

Fig. S8 Refined interatomic distances of  $M\text{-TbTaO}_4$  at 1.6 K and 20K as a function of magnetic field. Obtained from Rietveld refinement of powder neutron diffraction (PND) data collected on HRPT, PSI.  $\lambda = 2.45 \text{ \AA}$ .

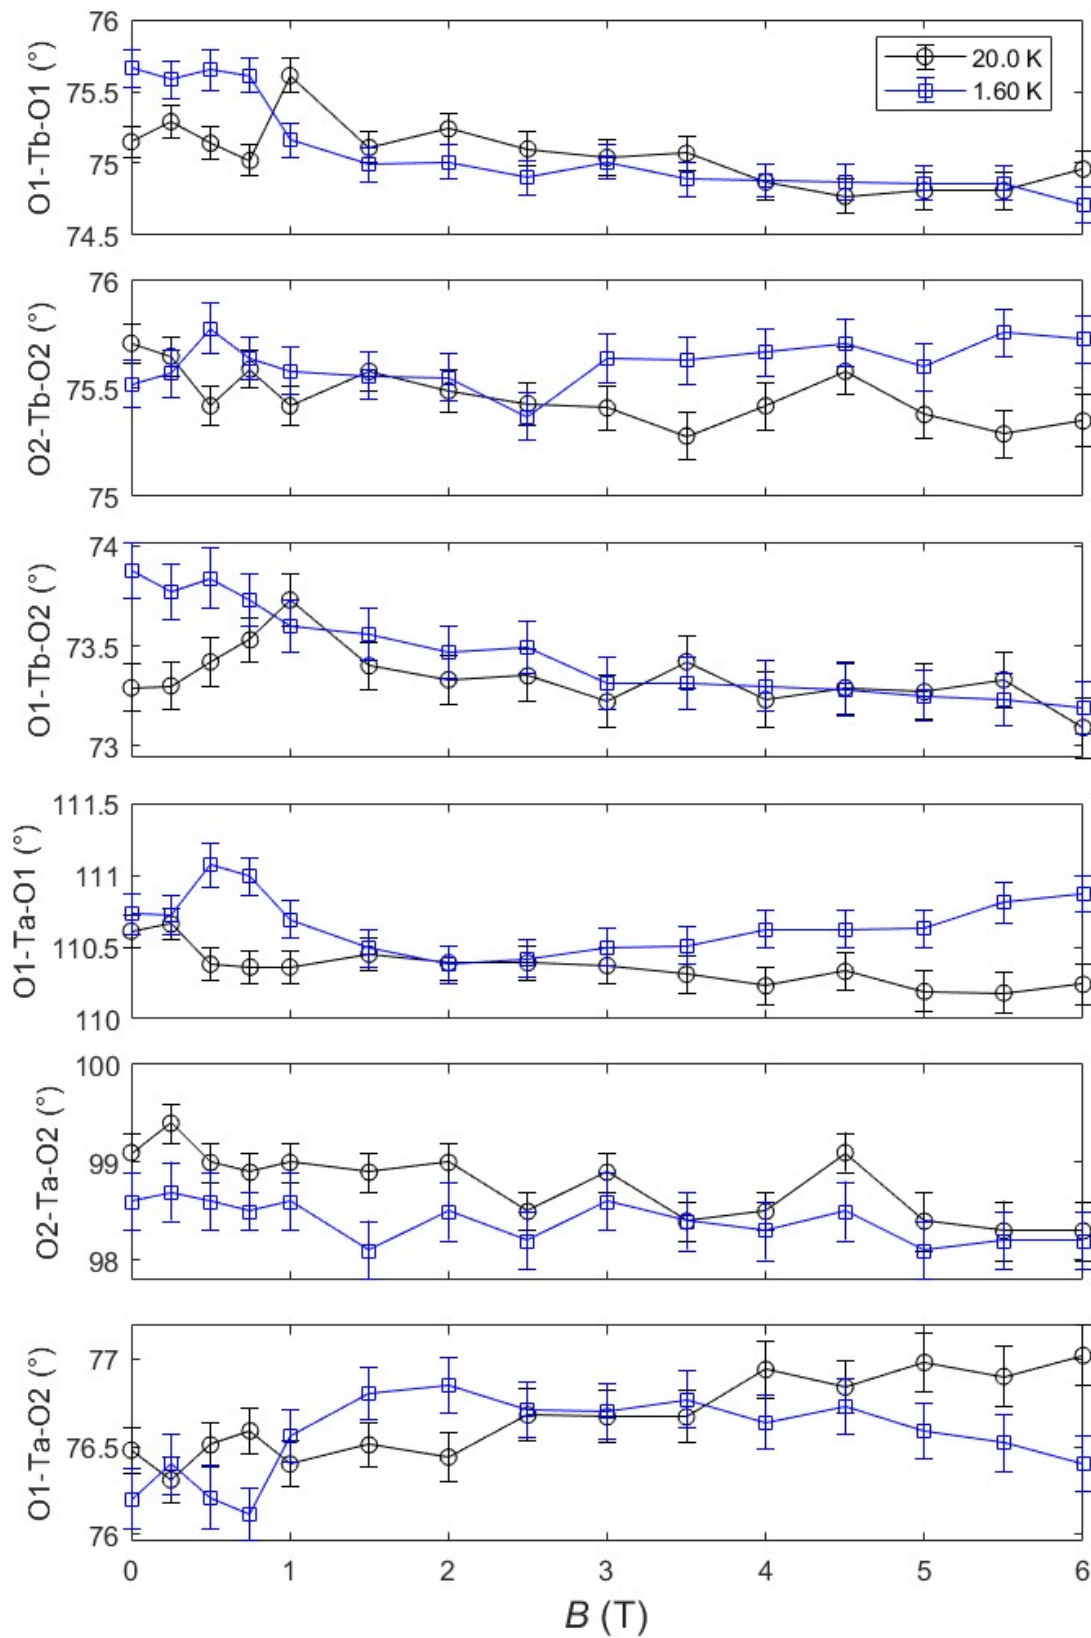

Fig. S9 Refined bond angles of  $M\text{-TbTaO}_4$  at 1.6 K and 20K as a function of magnetic field. Obtained from Rietveld refinement of powder neutron diffraction (PND) data collected on HRPT, PSI.  $\lambda = 2.45 \text{ \AA}$ .

## Reference

1. E. Gopal, *Specific heats at low temperatures*, Springer Science & Business Media, 2012.
2. N. D. Kelly, L. Yuan, R. L. Pearson, E. Suard, I. P. Orench and S. E. Dutton, *Phys Rev Mater*, 2022, **6**, 044410.
3. N. D. Kelly, C. V. Colin, S. E. Dutton, V. Nassif, I. P. Orench and E. Suard, *Institut Laue-Langevin*, 2021, DOI: 10.5291/ILL-DATA.5-31-2854.
